# Supplementary material for: Antibiotic Use on Goat Farms: An Investigation of Knowledge, Attitudes, and Behaviors of Missouri Goat Farmers
Source: MDPI journal article supplement (doi:10.3390/ani8110198), 2018-11-06
Supplement: s1 [file s1]

**Broad purpose of the study is to determine the farmers' use of antibiotics.**

**Specific aims:**

1. Why do they use antibiotics with their goats?
2. When do they know they need to use antibiotics?
3. What role does a veterinarian play in their decision to use antibiotics?
4. What types of antibiotics do they use for what conditions?

**Interview Guide**

1. How would you describe the health of the goats on your farm?
2. Do you have a protocol for diagnosing and treating medical conditions on your farm?
  - a. If yes – could you please describe your protocol to me?
  - b. If no – why do you not have a protocol?
3. Who do you rely on regarding overall animal health?
  - a. Where do you get most of your information regarding antibiotics?
4. When your goats are sick, what types of antibiotics do you use on your goats?
  - a. What conditions do you treat with antibiotics?
  - b. How do you get these medications?
5. Can you tell me what factors/criteria lead you to decide to use antibiotics on your goats?
  - a. Can you tell me some benefits of using antibiotics on your animals?
  - b. Can you describe some disadvantages to using antibiotics on your animals?
  - c. Do you use any alternative treatment methods for your goats?
    - i. Why/why not?
6. What role does a veterinarian play in your decision to administer antibiotics?
  - a. Can you describe the relationship you have with your goats' veterinarian?
  - b. Does the veterinarian come to the farm or do you have to bring your goats to him/her?
  - c. Does your veterinarian do any phone consulting?
    - i. If yes – could you describe the circumstances?
  - d. Do you trust the veterinarian's recommendations?
    - i. Why/why not?
7. Do you use antibiotics not prescribed by a veterinarian on your farm?
  - a. If so, what kinds?
  - b. Are there any other considerations when using antibiotics in this manner?
  - c. Is cost a factor when deciding to use antibiotics not prescribed by a veterinarian?
8. What are your thoughts about antibiotic resistance?
9. Do you feel that farmers play a role in antibiotic/antimicrobial resistance?
  - a. Please explain
10. Is there any other information that you feel is important for me to know about your experience as a goat farmer?
