# Supplementary material for: Antibiotic Use on Goat Farms: An Investigation of Knowledge, Attitudes, and Behaviors of Missouri Goat Farmers
Source: MDPI journal article supplement (doi:10.3390/ani8110198), 2018-11-06
Supplement: s1 [file s1]

## Demographic Questionnaire

How old are you?: \_\_\_\_\_

How would you describe your race or ethnicity?: \_\_\_\_\_

Address: \_\_\_\_\_

\_\_\_\_\_

Address of goats (if different): \_\_\_\_\_

\_\_\_\_\_

How many goats are on your farm?: \_\_\_\_\_

- (if less than 3, then end the survey)

How long in years have you been practicing as a goat farmer?: \_\_\_\_\_

Other than goats, what other animals are on your farm?:

\_\_\_\_\_

---

Check the types of farming practices/products your farm produces:

- ☐ Meat
- ☐ Milk
- ☐ Wool/Fiber
- ☐ Other

Is farming your full-time occupation? \_\_\_\_\_

If no, what is: \_\_\_\_\_

Have you ever used antibiotics for your goats? \_\_\_\_\_

- (If no, end here. If yes, go on to the interview)
